# Supplementary material
Source: PubMed Central journal article supplement (PMC4485525)

Figure S2: Power Calculations for Study Endpoints after the Dataset was Locked and Prior to Any Outcomes Analyses (10/18/2013)

A) Mortality Outcomes

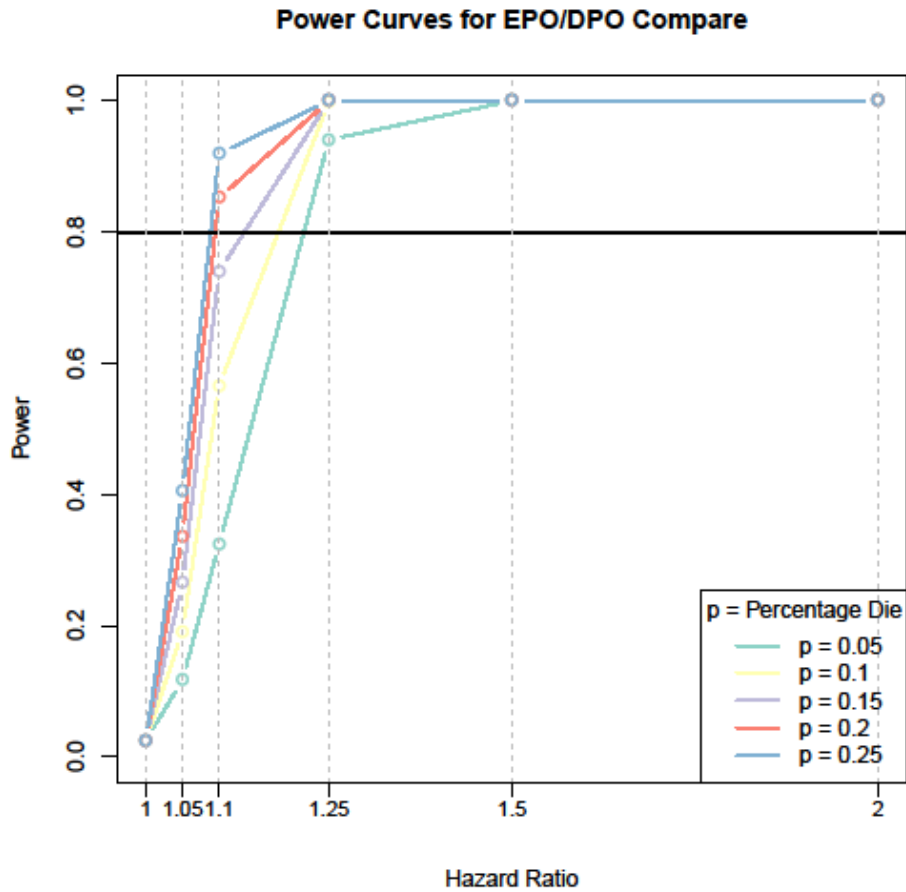

**B) Nonfatal and Composite Cardiovascular Events**

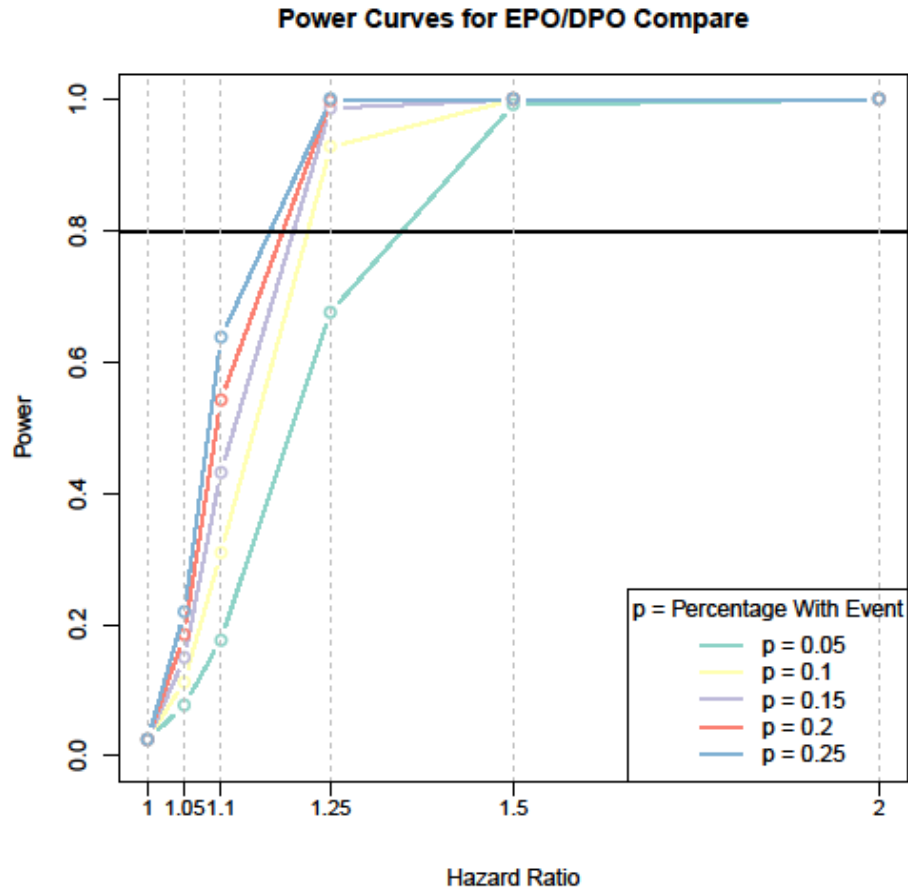

Supplement: NIHMS673382-supplement-2.pdf [file NIHMS673382-supplement-2.pdf]
