# Supplementary material
Source: PubMed Central journal article supplement (PMC4485525)
Supplement: NIHMS673382-supplement-3.pdf [file NIHMS673382-supplement-3.pdf]

**Figure S3: Mean monthly hemoglobin concentrations and corresponding 95% confidence bands among Medicare A&B beneficiaries, from day 91 onwards**

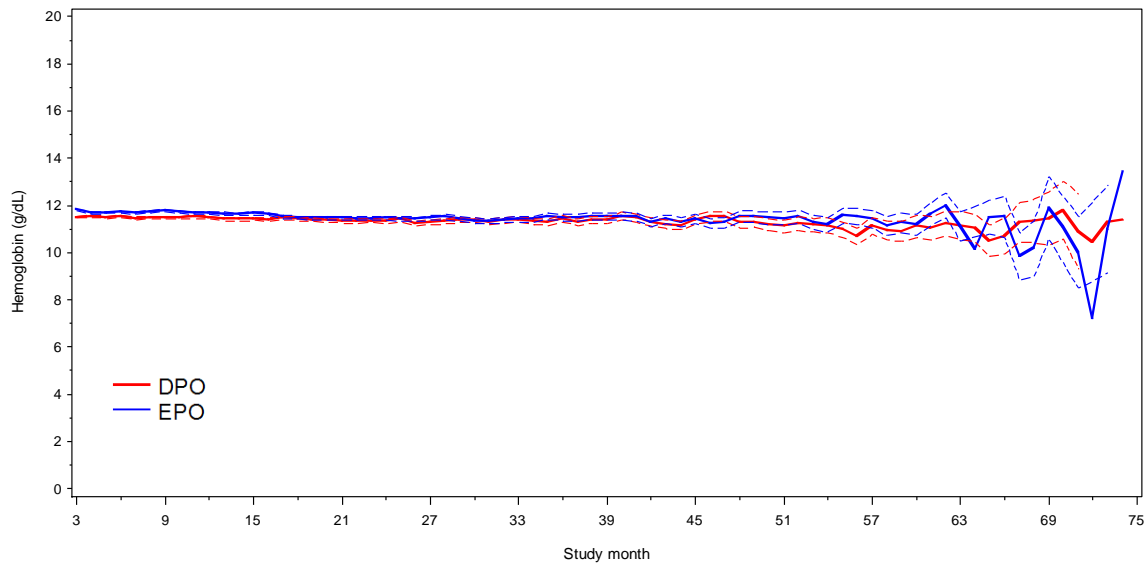

Note: Since Medicare Parts A&B coverage is required for the ascertainment of hemoglobin concentrations from claims for erythropoiesis-stimulating agents, the population corresponds to the one of 9455 incident hemodialysis patients used to evaluate non-fatal outcomes.
