# Supplementary material
Source: PubMed Central journal article supplement (PMC4485525)
Supplement: NIHMS673382-supplement-5.pdf [file NIHMS673382-supplement-5.pdf]

**Table S1: Characteristics of Patients Initiating Dialysis in Matched Darbepoetin Alfa and Epoetin Alfa Facilities who had Medicare Fee-For-Service Coverage**

| Variable (% missing)             | All Patients |          | Darbepoetin Alfa |          | Epoetin Alfa |          | SD    |
|----------------------------------|--------------|----------|------------------|----------|--------------|----------|-------|
|                                  | N or Median  | % or IQR | N or Median      | % or IQR | N or Median  | % or IQR |       |
|                                  | 9455         | (100.0)  | 4542             | (48.0)   | 4913         | (52.0)   |       |
| Age, years                       | 65           | (55-77)  | 66               | (56-77)  | 65           | (55-76)  | 6.7   |
| Female sex                       | 4259         | (45.0)   | 2031             | (44.7)   | 2228         | (45.3)   | -1.3  |
| Race (<0.1%)                     |              |          |                  |          |              |          |       |
| White                            | 6395         | (67.6)   | 3156             | (69.5)   | 3239         | (65.9)   | 7.6   |
| Black                            | 2508         | (26.5)   | 1151             | (25.3)   | 1357         | (27.6)   | -5.2  |
| Asian                            | 309          | (3.3)    | 108              | (2.4)    | 201          | (4.1)    | -9.7  |
| Other                            | 239          | (2.5)    | 126              | (2.8)    | 113          | (2.3)    | 3.0   |
| Hispanic ethnicity (0.4%)        | 1029         | (10.9)   | 356              | (7.8)    | 673          | (13.7)   | -19.1 |
| Medicaid eligibility             | 2854         | (30.2)   | 1362             | (30.0)   | 1492         | (30.4)   | -0.9  |
| Received EPO prior to ESRD       | 2834         | (30.0)   | 1374             | (30.3)   | 1460         | (29.7)   | -0.1  |
| <u>Comorbidities</u>             |              |          |                  |          |              |          |       |
| Diabetes                         | 5288         | (55.9)   | 2580             | (56.8)   | 2708         | (55.1)   | 3.3   |
| Hypertension                     | 8158         | (86.3)   | 3941             | (86.8)   | 4217         | (85.8)   | 2.5   |
| Arteriosclerotic Heart Disease   | 2791         | (29.5)   | 1321             | (29.1)   | 1470         | (29.9)   | -1.9  |
| Heart Failure                    | 3579         | (37.9)   | 1743             | (38.4)   | 1836         | (37.4)   | 2.0   |
| Peripheral Vascular Disease      | 1599         | (16.9)   | 777              | (17.1)   | 822          | (16.7)   | 1.0   |
| Cerebrovascular Disease          | 1126         | (11.9)   | 530              | (11.7)   | 596          | (12.1)   | -1.5  |
| Chronic Obstructive Lung Disease | 1149         | (12.2)   | 613              | (13.5)   | 536          | (10.9)   | 7.9   |
| Cancer                           | 763          | (8.1)    | 418              | (9.2)    | 345          | (7.0)    | 8.0   |
| Unable to ambulate or transfer   | 824          | (8.7)    | 404              | (8.9)    | 420          | (8.5)    | 1.2   |
| Tobacco Use                      | 678          | (7.2)    | 339              | (7.5)    | 339          | (6.9)    | 2.2   |
| Drug Use                         | 179          | (1.9)    | 79               | (1.7)    | 100          | (2.0)    | -2.2  |
| Alcohol Use                      | 147          | (1.6)    | 68               | (1.5)    | 79           | (1.6)    | -0.9  |
| <u>Reported measurements</u>     |              |          |                  |          |              |          |       |

|                                                                            |      |             |      |             |      |             |      |
|----------------------------------------------------------------------------|------|-------------|------|-------------|------|-------------|------|
| Body Mass Index (kg/m <sup>2</sup> ; 1.8%)                                 | 28.8 | (23.4-32.9) | 29.1 | (23.5-33.0) | 28.6 | (23.3-32.7) | 6.1  |
| Hemoglobin, g/dL (10.3%)                                                   | 10.0 | (8.9-11.0)  | 10.1 | (9.0-11.0)  | 9.9  | (8.8-10.9)  | 10.6 |
| Serum Albumin mg/dL (21.2%)                                                | 3.1  | (2.7-3.6)   | 3.2  | (2.7-3.7)   | 3.1  | (2.7-3.6)   | 12.2 |
| eGFR at time of dialysis initiation, mL/min per 1.73 m <sup>2</sup> (1.9%) | 10.8 | (7.4-13.3)  | 11.0 | (7.7-13.5)  | 10.5 | (7.1-13.1)  | 10.3 |

Incident hemodialysis patients in the study facilities who had Medicare Part A and B coverage on day 90 after initiation of dialysis were captured for analysis of claims-based endpoints.

Abbreviations: eGFR – estimated glomerular filtration rate; ESA – erythropoiesis-stimulating agent; ESRD – end-stage renal disease; IQR – interquartile range; SD – standardized difference.
