# Supplementary material
Source: PubMed Central journal article supplement (PMC4485525)
Supplement: NIHMS673382-supplement-6.pdf [file NIHMS673382-supplement-6.pdf]

**Table S2: Follow-up Time, Number of Events, Incidence Rates, and Hazards Ratios; Incident Patients in Hemodialysis Centers Using Darbepoetin Alfa vs. Epoetin Alfa (Restricted to Patients without Missing Data for Variables Included in Model 1)**

| Outcomes                                                                  | Sample Size | Follow-up Time<br>(person-years) | Number of<br>Events | Incidence Rate<br>(per 1000 person-years) | Unadjusted HR<br>(95% CI) | Model 1, HR<br>(95% CI) |
|---------------------------------------------------------------------------|-------------|----------------------------------|---------------------|-------------------------------------------|---------------------------|-------------------------|
| Mortality                                                                 | 19816       | 21848.29                         | 5508                | 252.10                                    | 1.12<br>(1.05, 1.19)      | 1.06<br>(0.99, 1.13)    |
| Cardiovascular Mortality                                                  | 19816       | 21848.29                         | 2029                | 92.87                                     | 1.11<br>(1.00, 1.23)      | 1.05<br>(0.94, 1.16)    |
| Stroke                                                                    | 9412        | 10427.18                         | 246                 | 23.59                                     | 1.00<br>(0.73, 1.36)      | 1.07<br>(0.78, 1.47)    |
| Myocardial Infarction                                                     | 9412        | 10334.57                         | 370                 | 35.80                                     | 1.17<br>(0.91, 1.50)      | 1.17<br>(0.91, 1.51)    |
| Composite (Stroke,<br>Myocardial Infarction,<br>Cardiovascular Mortality) | 9412        | 10161.81                         | 1416                | 139.35                                    | 1.10<br>(0.96, 1.25)      | 1.10<br>(0.97, 1.25)    |

Model 1 adjusted for age, sex, race, Hispanic ethnicity, Medicaid eligibility, and incidence year.

Time-to-event analyses started on the day of reported incidence of end-stage renal disease for mortality outcomes and on day 91 after end-stage renal disease for non-fatal and composite outcomes
