# Supplementary material
Source: PubMed Central journal article supplement (PMC4485525)
Supplement: NIHMS673382-supplement-7.pdf [file NIHMS673382-supplement-7.pdf]

**Table S3: Follow-up Time, Number of Events, Incidence Rates, and Hazards Ratios; Incident Patients in Hemodialysis Centers Using Darbepoetin Alfa vs. Epoetin Alfa (Restricted to Patients who were reportedly ESA-naïve)**

| Outcomes                                         | Sample Size | Follow-up Time (years) | Number of Events | Incidence Rate (per 1000 person-years) | Unadjusted HR (95% CI) | Model 1, HR (95% CI) | Model 2, HR (95% CI) |
|--------------------------------------------------|-------------|------------------------|------------------|----------------------------------------|------------------------|----------------------|----------------------|
| Mortality                                        | 11558       | 12422.51               | 3279             | 263.96                                 | 1.12<br>(1.03, 1.22)   | 1.03<br>(0.95, 1.12) | 1.01<br>(0.92, 1.10) |
| Cardiovascular Mortality                         | 11558       | 12422.51               | 1241             | 99.90                                  | 1.13<br>(0.99, 1.30)   | 1.04<br>(0.90, 1.19) | 1.01<br>(0.87, 1.17) |
| Stroke                                           | 5474        | 5964.48                | 136              | 22.80                                  | 1.29<br>(0.83, 1.98)   | 1.30<br>(0.84, 2.02) | 1.23<br>(0.79, 1.91) |
| Myocardial Infarction                            | 5474        | 5916.88                | 202              | 34.14                                  | 1.18<br>(0.84, 1.68)   | 1.17<br>(0.82, 1.67) | 1.11<br>(0.77, 1.60) |
| Composite (Stroke, MI, Cardiovascular Mortality) | 5474        | 5821.34                | 836              | 143.61                                 | 1.20<br>(1.01, 1.42)   | 1.15<br>(0.96, 1.37) | 1.13<br>(0.95, 1.35) |
