# Supplementary material
Source: PubMed Central journal article supplement (PMC4485525)

**Figure S1: Timing of Facility Switches from Epoetin Alfa to Darbepoetin Alfa**

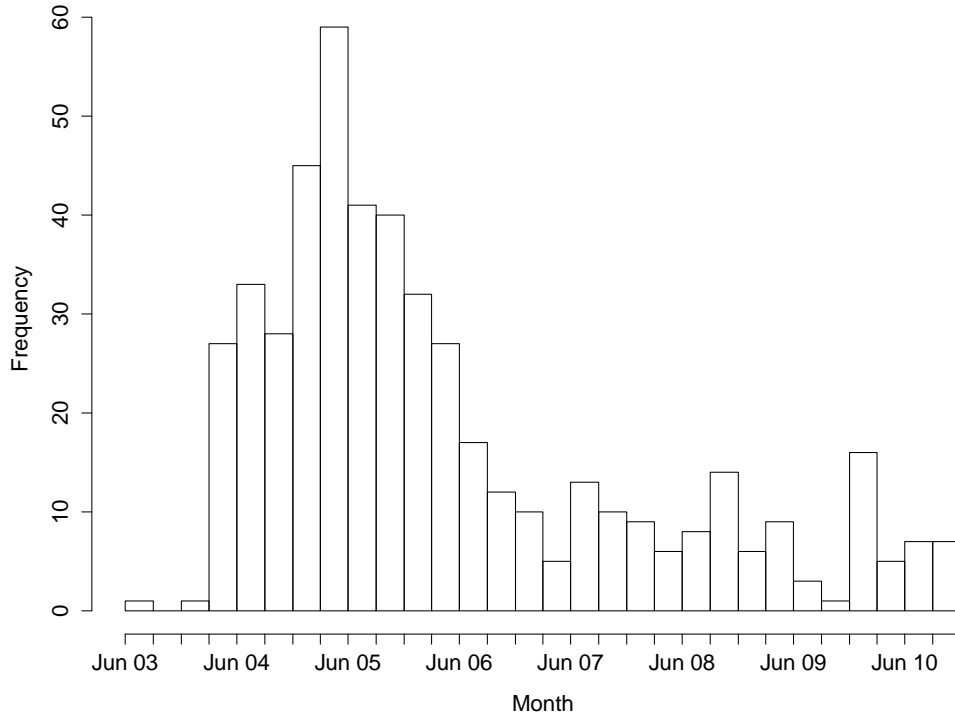

Supplement: NIHMS673382-supplement-1.pdf [file NIHMS673382-supplement-1.pdf]
